# Supplementary material for: Foxo1 regulates Dbh expression and the activity of the sympathetic nervous system in vivo
Source: PubMed Central journal article supplement — Mol Metab. 2014 Jul 29;3(7):770–7. doi: 10.1016/j.molmet.2014.07.006 (PMC4209360; doi:10.1016/j.molmet.2014.07.006), 2014-07-29
Supplement: mmc1.pdf [file mmc1.pdf]

## Supplemental information

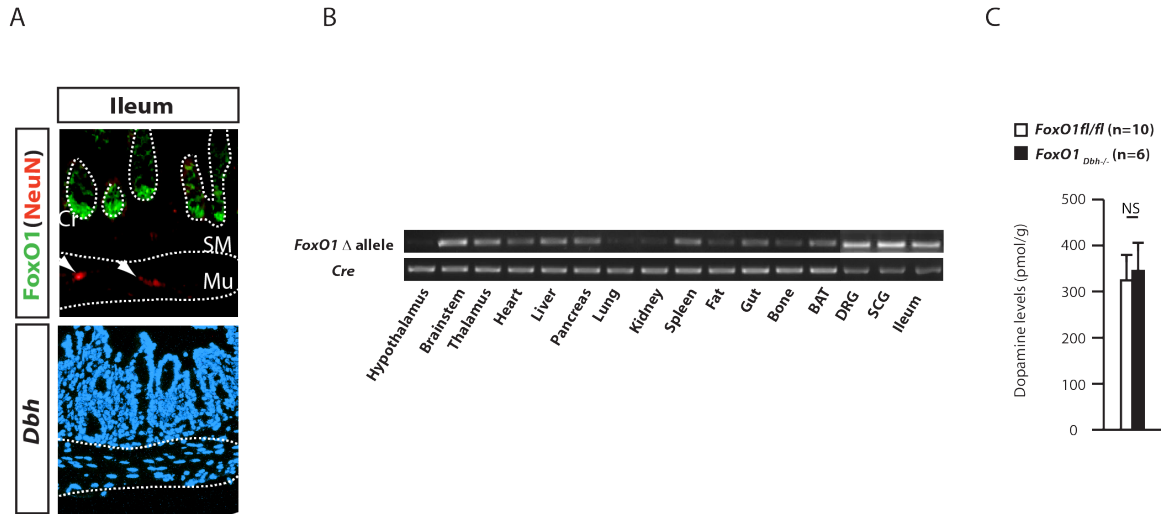

**Supplemental Figure 1.** (A) FoxO1 and *Dbh* expression in ileum. Cr: Crypts.

SM: Submucosa. Mu: Muscularis. Arrow: Myenteric neurons. (B) Detection of

*FoxO1* mutant allele in genomic DNA isolated from tissues from *FoxO1<sup>fl/fl</sup> Dbh-*

*cre* (*FoxO1<sup>Dbh-/-</sup>*) female mouse. (C) Dopamine content in the brainstem of 36

week-old *FoxO1<sup>fl/fl</sup>* and *FoxO1<sup>Dbh-/-</sup>* mice.

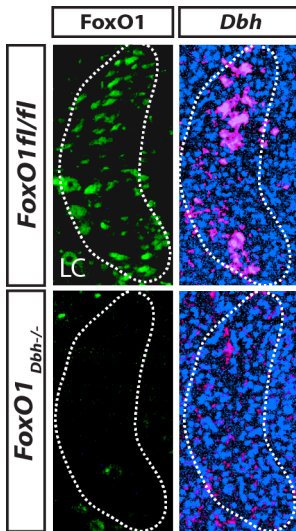

**Supplemental Figure 2.** FoxO1 and *Dbh* expression in 6 week-old *FoxO1<sup>fl/fl</sup>* and *FoxO1<sup>Dbh-/-</sup>* locus coeruleus.

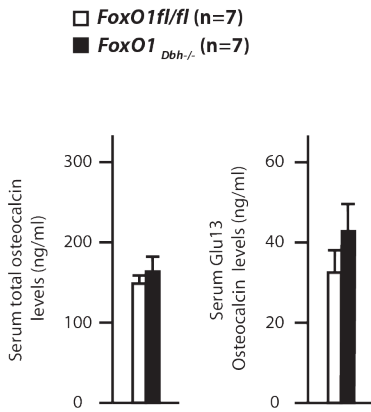

**Supplemental Figure 3.** Total and Glu13 osteocalcin levels of 36 week-old *FoxO1<sup>fl/fl</sup>* and *FoxO1<sup>Dbh-/-</sup>* mice.
